1     **Understanding Pain in Polycystic Ovary Syndrome: Health Risks and Treatment Effectiveness**

2     Tess Cherlin, PhD <sup>1</sup>, Stephanie Mohammed, PhD <sup>1</sup>, Sasha Ottey, MHA <sup>2</sup>, Katherine Sherif, MD <sup>3</sup>, Shefali S. Verma  
3     PhD <sup>1</sup>

4     <sup>1</sup> Department of Pathology and Laboratory Medicine, Perelman School of Medicine, Philadelphia, PA, United  
5     States.

6     <sup>2</sup> PCOS Challenge: The National Polycystic Ovary Syndrome, Atlanta, GA, USA.

7     <sup>3</sup> Department of Medicine, Sidney Kimmel Medicine College, Thomas Jefferson University, Philadelphia, PA, USA

8

9

10

11

12     **Corresponding Author:**

13     Shefali S. Verma

14     [shefali.setiaverma@pennmedicine.upenn.edu](mailto:shefali.setiaverma@pennmedicine.upenn.edu)

15

16

17

18

19

20

21

22

23

## 24 **Abstract**

25 Polycystic ovary syndrome (PCOS) is a prevalent endocrine disorder in women, often accompanied by various  
26 symptoms including significant pain, such as dysmenorrhea, abdominal, and pelvic pain, which remains  
27 underexplored. This retrospective study examines electronic health records (EHR) data to assess the prevalence of  
28 pain in women with PCOS. Conducted on May 29, 2024, using data from 120 Health Care Organizations within the  
29 TriNetX Global Network, the study involved 76,859,666 women from diverse racial backgrounds. The analysis  
30 focused on the prevalence of pain among women with PCOS, both overall and in those prescribed PCOS-related  
31 medications. Relative risk ratios (RR) were calculated for future health outcomes and stratified by self-reported race.  
32 The study found that 19.21% of women with PCOS experienced pain, with the highest prevalence among Black or  
33 African American (32.11%) and White (30.75%) populations. Both the PCOS and PCOS and Pain cohorts exhibited  
34 increased RR for various health conditions, with significant differences noted across racial groups for infertility,  
35 ovarian cysts, obesity, and respiratory diseases. Additionally, women with PCOS who were treated with PCOS-  
36 related medications showed a decrease in pain diagnoses following treatment. In conclusion, this study highlights  
37 the critical need to address pain in the diagnosis and management of PCOS due to its significant impact on patient  
38 health outcomes.

39 **Key words:** PCOS, polycystic ovary syndrome, pain, abdominal pain, pelvic pain, dysmenorrhea, health disparities,  
40 future health outcomes

## 41 **Impact Statement**

42 Insufficient data exist on the prevalence of pain in women with a PCOS diagnosis, and its associations with future  
43 health outcomes. Among, 444,348 women with PCOS in the TriNextX Global Network, 19.21% have  
44 dysmenorrhea, abdominal, and pelvic pain. Women with PCOS and Pain are at increased risk for developing ovarian  
45 cysts, infertility, T2D, and fatty liver disease and are at further risk when stratified by self-reported race groups.

46

47

48

## 49 **Introduction**

50 According to the World Health Organization (WHO), polycystic ovary syndrome (PCOS) affects approximately 8-  
51 13% of women of reproductive age, with an alarming 70% of affected individuals remaining undiagnosed  
52 globally(Organization, 28 June 2023). The assessment of PCOS has been substantiated by multiple guidelines  
53 (Azziz et al., 2016; Teede et al., 2010)and has undergone refinement since its initial description by Stein and  
54 Leventhal in 1935(Stein & Leventhal, 1935). Standard diagnostic criteria have evolved through international efforts,  
55 including conferences convened by the National Institutes of Health (NIH) in 1990(Zawadri, 1992), the  
56 ESHRE/ASRM-sponsored PCOS consensus workshop group in Rotterdam in 2003 and 2004(ESHRE & Group,  
57 2004), and the International Evidence-based Guideline for the Assessment and Management of Polycystic Ovary  
58 Syndrome in 2018, most recently updated in 2023(Mousa & Tay, 2023; Teede et al., 2018).

59 Recommendations for assessing PCOS encompass a multifaceted approach, including the evaluation of irregular  
60 menstrual cycles, ovulatory dysfunction, biochemical and clinical hyperandrogenism, ultrasound findings, serum  
61 Anti-Mullerian Hormone (AMH) levels, and various other factors such as ethnic disparities, cardiovascular disease  
62 risk, menopausal status, impaired glucose tolerance, and risk of type 2 diabetes mellitus (T2DM)(Mousa & Tay,  
63 2023; Teede et al., 2018). Additionally, screening and managing psychological manifestations, implementing  
64 lifestyle interventions, and adhering to pharmacological treatment principles are integral aspects of PCOS  
65 management(Mousa & Tay, 2023; Teede et al., 2018). While the diagnostic criteria for PCOS primarily focus on  
66 reproductive and metabolic manifestations, the substantial burden of *pain* experienced among women with PCOS is  
67 a critical factor that warrants effective prevention and management of the disease.

68 The assessment of pain in PCOS necessitates a multidimensional approach, incorporating self-reported scales,  
69 clinical evaluation, and possibly imaging techniques to elucidate the underlying etiology and severity. Several  
70 commonly utilized assessment tools incorporate evaluations of pain among women with PCOS. The Polycystic  
71 Ovary Syndrome Health-Related Quality of Life Questionnaire (PCOSQ), developed by Cronin et al. in 1998,  
72 assesses various domains, including painful menstrual cycles(Cronin et al., 1998). Additionally, the SF-36 scale,  
73 examines eight dimensions of health, including bodily pain(McHorney et al., 1993). Women with PCOS across  
74 diverse demographic backgrounds have consistently reported lower SF-36 scores specifically in the domain of

75 bodily pain(Drosdzol et al., 2007; Elsenbruch et al., 2003; Hahn et al., 2005; Li et al., 2011). Furthermore, the  
76 Menorrhagia Outcomes Questionnaire, developed by Lamping et al. in 1998, evaluates both heavy menstrual  
77 bleeding (HMB) and the associated pain(Lamping et al., 1998). Despite the validation of these instruments, they  
78 may not comprehensively capture key symptoms expressed by patients with PCOS, especially those related to  
79 dysmenorrhea, abdominal, or pelvic pain. Insufficient data exist to highlight the prevalence of pain reported by  
80 women both before and after a PCOS diagnosis, as well as any associations between this pain and the condition  
81 itself and its long-term effects. To address this gap in research, we propose an investigation utilizing health records  
82 to shed light on this underexplored aspect of PCOS.

83 Electronic health records (EHRs) have become indispensable for managing vast amounts of clinical data, including  
84 patient demographics, medical history, medications, allergies, laboratory test results, vital signs, and imaging  
85 reports, as well as genetic information obtained from patient genomes when available. Given that EHRs contain  
86 comprehensive information about patient care, including the progression of signs and symptoms, severity,  
87 comorbidities, and treatments, they provide invaluable resources for conducting large-scale retrospective studies.  
88 EHR-based studies have been particularly valuable in assessing the prevalence of conditions that are often  
89 underdiagnosed or misdiagnosed in women(Kruse et al., 2018; Maletzky et al., 2022; Penrod et al., 2023). The  
90 temporal aspect of clinical events, such as the onset of symptoms, treatment administration, and follow-up visits, can  
91 also be mined from EHRs, providing crucial insights into disease trajectories and treatment efficacy(Zhao et al.,  
92 2017).

93 Pain, particularly in the context of PCOS, remains an underexplored area of research. By leveraging EHR data we  
94 can identify women with PCOS who have reported dysmenorrhea, abdominal, and pelvic pain. The objective of this  
95 research is to use EHR and look at longitudinal data retrospectively to determine the pain reported by women with  
96 PCOS and to determine associations with other factors. This study aims to explore the prevalence of pain in women  
97 with and without PCOS, examine the relative risk of long-term health outcomes in those with and without pain, and  
98 assess the impact of medications on pain symptoms. By analyzing longitudinal EHR data, we seek to uncover  
99 patterns associated with comorbidities, infertility, and medication usage, and explore their potential effects on pain  
100 thresholds. Our approach will provide insights into the relationship between pain symptoms and PCOS contributing  
101 to a better understanding of the condition and potentially improving patient care.

102

103

## 104 **Methods**

### 105 **Study Design**

106 The data used in this study was collected on May 29<sup>th</sup>, 2024 at 3:00pm EST from the TriNetX<sup>20</sup> Global Network,  
107 which provided access to electronic medical records (diagnoses, procedures, medications, laboratory values,  
108 genomic information) from approximately 140,962,260 million patients from 120 healthcare organizations.

### 109 **Cohort Definitions**

110 A retrospective cohort analysis was conducted for patients with PCOS and patients with PCOS and Pain. Patients  
111 who were identified as cases (met inclusion and exclusion criteria) were compared to their respective controls.  
112 Description of inclusion and exclusion criteria for each cohort can be found in **Supplemental Table 1 – Figure**  
113 **supplement 1.**

114 For the PCOS cohort, PCOS was defined as either having a PCOS diagnosis (ICD 10 E28.2), or an irregular  
115 menstruation (ICD 10 N92.6) and hirsutism (ICD 10 L68.0) diagnosis, or an irregular menstruation (ICD 10 N92.6)  
116 and androgen excess (ICD 10 E28.1) diagnosis. PCOS controls were defined as having a physical examination (ICD  
117 10 Z00.0) and none of the PCOS case criteria. PCOS participants also had to satisfy stringent exclusion criteria to  
118 avoid confounders. Exclusion criteria for PCOS consisted of Maternal care for benign tumor of corpus uteri (ICD 10  
119 O34.1), Leiomyoma of uterus (ICD 10 D25), Endometriosis (ICD 10 N80), Polyp of corpus uteri (ICD 10 N84.0),  
120 and Female pelvic inflammatory disease unspecified (ICD 10 N73.9). Description of inclusion and exclusion criteria  
121 for each cohort can be found in **Table 1 - Figure supplement 1.**

122 For the PCOS and Pain cohort, PCOS was defined the same as above. PCOS and Pain cases were defined as patients  
123 with a PCOS case as well as being diagnosed for either abdominal and pelvic pain (ICD 10 R10) or dysmenorrhea  
124 (ICD 10 N94.6) +/- three months from their first PCOS diagnosis. PCOS and Pain controls were defined as patients  
125 with PCOS but no pain diagnoses. Description of inclusion and exclusion criteria for each cohort can be found in  
126 **Table 1- Figure supplement 1.**

127 To compare cohorts (cases / controls), the first documented encounter or PCOS (case / controls) or PCOS and Pain  
128 (case / controls) was defined as an “index event” in TriNetX. Index events are the specific dates a patient satisfies all  
129 selected cohort criteria. Baseline characteristics are all assessed *before* the index event while all health outcomes are  
130 assessed *after* the index event. **Figure 1- Figure supplement 2** shows a graphical representation of this relationship  
131 among index events and outcomes specified in this study.

### 132 **Propensity Score Matching**

133 The TriNetX platform uses a cohort matching method called 1:1 propensity score matching(Austin, 2011). For each  
134 cohort analysis, cases were matched on the following criteria: age at the index event, self-reported race, overweight,  
135 obesity, and other hyperalimentionation (ICD 10 E65-E69) status, type 2 diabetes mellitus (T2D) (ICD 10 E11) status,  
136 essential (primary) hypertension (ICD 10 I10) status, and hyperlipidemia, unspecified (ICD 10 E78.5) status.  
137 Baseline conditions were assessed up to one day before the index event. **Figure 1** shows the number of patients in  
138 each case and control cohort both at baseline and after propensity score matching.

### 139 **Future Health Outcomes**

140 For each of the five cohorts listed above, we calculated relative risk ratios (RR) with 95% confidence intervals for  
141 10 future health outcomes: mental, behavioral and neurodevelopmental disorders (ICD 10 F01-F99), female  
142 infertility (ICD 10 N97), noninflammatory disorders of ovary, fallopian tube and broad ligament (ICD 10 N83),  
143 Obesity (ICD 10 E65-E68), Type 2 Diabetes (ICD 10 E11), diseases of the circulatory system (ICD 10 I00-I99),  
144 diseases of the respiratory system (J00-J99), abdominal and pelvic pain (ICD 10 R10) or dysmenorrhea, unspecified  
145 (ICD 10 N94.6), nonalcoholic steatohepatitis (ICD 10 K75.81) or fatty liver, not elsewhere classified (ICD 10  
146 K76.0), and chronic kidney disease (ICD 10 N18). The RR for future health outcomes was calculated on participants  
147 who satisfied the 1:1 propensity score matching criteria (above). Differences in relative risks were calculated for  
148 significance by calculating the difference of two estimates(Altman & Bland, 2003). Future health outcomes were  
149 only considered if their first occurrence was at least 3-months after the index event. **Figure 1** shows the health  
150 outcomes assessed after 1:1 propensity score matching(Austin, 2011; Guo & Fraser, 2014; Haukoos & Lewis, 2015).  
151 These analyses were done within the TriNetX platform, and no individual-level data was extracted from the  
152 platform.

### 153 **Self-reported Race Stratified Sub-Analysis**

154 We did a follow-up analysis looking at health outcomes for patients with PCOS and PCOS and Pain compared to  
155 matched controls stratified by self-reported race and ethnicity. The following race categories are present in the  
156 TriNetX platform: American Indian or Alaskan Native, Asian, Black or African American, Native Hawaiian or  
157 Other Pacific Islander, Other, White, and Unknown Race. For our analysis, we included the following four race  
158 categories: Asian, Black or African American, and Other (American Indian or Alaskan Native or Native Hawaiian  
159 or Other Pacific Islander, or Other), and White (**Figure 2 - Figure supplement 3**). Due to the small population sizes  
160 of American Indian or Alaskan Native or Native Hawaiian or Other Pacific Islander, or Other, we decided to  
161 combine these four self-reported race groups together into one “Other” population. For the PCOS cohorts we looked  
162 at the pain health outcome stratified by self-reported race (**Figure 2A - Figure supplement 3**). For the PCOS and  
163 Pain cohorts, we looked at ovarian cysts, infertility, obesity, T2D, mental health conditions, circulatory diseases,  
164 respiratory diseases, liver disease, and kidney disease stratified by self-reported race (**Figure 2B - Figure  
165 supplement 3**).

### 166 **PCOS Medication Sub-analysis**

167 We performed a follow-up analysis looking at the number of patients with PCOS who were documented as having  
168 pain before being prescribed three common PCOS medications (systemic contraceptives (VA: HS200), metformin  
169 (RxNorm 6809), or spironolactone (RxNorm 9997) as shown in **Figure 3 - Figure supplement 4**. Three cohorts  
170 were created for patients were included if they had a PCOS diagnosis (described above) *and* 1) ever had a systemic  
171 contraceptives prescription but not a metformin or spironolactone prescription, 2) ever had a metformin prescription  
172 but not a systemic contraceptives or spironolactone prescription, and 3) ever had a spironolactone but not a systemic  
173 contraceptives or metformin prescription. For patients with PCOS, we counted the number of participants who had a  
174 diagnosis code for either dysmenorrhea or abdominal and pelvic pain before the index event. The index event was  
175 defined as a participant having a PCOS diagnosis and a medication prescription at the same time. We then counted  
176 the number of patients with PCOS who reported either dysmenorrhea or abdominal and pelvic pain after the index  
177 event. We further compared the change in prevalence before and after the indexed event.

### 178 **Results**

179 **Demographics of women with PCOS in the TriNetX Global Network**

180 We first identified participants with PCOS and associated comorbidities. The demographics and characteristics of  
181 both the PCOS and non-PCOS cohorts are detailed in **Table 2 - Figure supplement 5**. We queried the 76,859,666  
182 women of any age from 120 Health Care Organizations (HCOs) in the TriNetX Global Network for PCOS and  
183 associated comorbidities. After applying stringent inclusion/exclusion criteria for PCOS and subsequent controls  
184 (see Methods), we were left with a total population of 7,005,733. We found a 7% (n = 468,805 prevalence of PCOS  
185 at an average age of 28.7 (SD ± 9.49) in this population. Of those participants with PCOS, 4.61%, 11.35%, 22.73%,  
186 and 61.32% self-identified as Asian, Black or African American, Other, or White respectively (**Table 2 - Figure**  
187 **supplement 5**).

188 We then examined the prevalence of PCOS-associated comorbidities represented in the PCOS cohort. We observed  
189 that 16.11% of patient with PCOS had a diagnosis code for obesity, 6.23% had a diagnosis code for essential  
190 hypertension, 4.01% had a diagnosis code for T2D, and 3.24% had a diagnosis code for hyperlipidemia (**Table 2 -**  
191 **Figure supplement 5**).

192 We also investigated the prevalence of other women's health conditions related to PCOS such as infertility and  
193 ovarian cysts. **Table 2 - Figure supplement 5** shows that women with PCOS had a 2.53% prevalence of infertility,  
194 a 3.55% prevalence of ovarian cysts.

195 The TriNetX platform also allow to easily survey the diagnoses that are most prevalent among a cohort population.  
196 As can be observed in **Table 2 - Figure supplement 5**, that respiratory system diseases, mental health conditions,  
197 and digestive system diseases were most prevalent among the PCOS cohort (24.24%, 20.97%, and 19.40%  
198 respectively).

199 Since many women with PCOS are prescribed medications to help manage symptoms associated with the disease,  
200 we aimed to gain a deeper understanding of the prevalence of PCOS-prescribed medications in the PCOS cohort.  
201 We found that 12.76% of the PCOS cohort were prescribed systemic oral contraceptives, 7.07% were prescribed  
202 metformin, and 2.77% were prescribed spironolactone (**Table 2 - Figure supplement 5**).

203 A focus of our paper is understanding the impact pain has on women with PCOS, therefore, we looked at the  
204 prevalence of both dysmenorrhea and abdominal and pelvic pain. We observed that overall, there was a 19.21%



205 prevalence of pain (2.46% prevalence of dysmenorrhea, 16.75% prevalence of abdominal or pelvic pain) (**Table 2 -**  
206 **Figure supplement 5**).

### 207 **Demographics of women with PCOS and Pain in the TriNetX Global Network**

208 As noted above, 19.21% of women with PCOS also had a pain diagnosis, encompassing either dysmenorrhea or  
209 pelvic and abdominal pain. We first examined the demographics of the study participants using data from the  
210 TriNetX Global Network. **Table 3 - Figure supplement 6** shows the comprehensive demographic results,  
211 highlighting the distribution of pain diagnoses for age, race, and other relevant demographic factors. This table  
212 provides a clear view of the demographic characteristics and their potential influence on the prevalence of pain  
213 among individuals with PCOS. Similar to the PCOS cohort, participants with PCOS and Pain had an average age of  
214 29.02 (SD  $\pm$  9.23) and among those 3.57% women were Asian, 12.54% Black or African America, 19.24%  
215 categorized as Other, and 64.65% self-reported as White (**Table 3 - Figure supplement 6**). However, when we  
216 looked at the prevalence of PCOS and Pain compared to controls (PCOS without pain) within a self-reported race  
217 group, we observed that the highest prevalence of PCOS and Pain was 32.11% in the Black or African American  
218 population followed by 30.75% in the White population, 24.75% in the Other population, and 22.74% in the Asian  
219 population (**Table 4 -- Figure supplement 7**). With respect to PCOS comorbidities, the cohort of individuals with  
220 both PCOS and Pain exhibited a higher prevalence of comorbid conditions compared to the entire population of  
221 individuals with PCOS. Specifically, 34.68% of PCOS and Pain participants had an obesity diagnosis, 13.36% had  
222 an essential hypertension diagnosis, 9.05% had a T2D diagnosis, and 8.09% had a hyperlipidemia diagnosis. These  
223 high prevalences represent a respective increase of 18.57%, 7.13%, 5.04%, and 4.85% compared to all participants  
224 with PCOS. Notably, as illustrated in **Figure 2**, there is at least a two-fold increase in the prevalence of each  
225 comorbid condition among those with both PCOS and Pain. This substantial increase highlights the heightened risk  
226 and burden of comorbidities within the PCOS and Pain cohort.

227 We observed a similar trend with respect to the most highly co-occurring diseases with PCOS. Diseases of the  
228 respiratory system, digestive system, and mental health conditions had prevalences of 44.81%, 42.85%, and 42.68%,  
229 respectively, which is at least a 2-fold increase for all three conditions compared to the entire PCOS cohort (**Figure**  
230 **2**). We also see a 2-fold increase in the prevalence of infertility (7.08%) and ovarian cysts (10.22%) in the PCOS  
231 and Pain cohort when we compared to the PCOS cohort as shown in **Figure 2**. Further, there is at least a 2-fold

232 increase in prescriptions for all three common PCOS symptom-management medications in PCOS and Pain cohort  
233 compared to PCOS cohort (**Figure 2**).

#### 234 **Relative Risk of Future Health Outcomes for all PCOS vs. PCOS and Pain**

235 Given that PCOS symptoms first manifest in puberty and during reproductive years, we aimed to assess the relative  
236 risk for patients with PCOS, and those with both PCOS and Pain, developing future health outcomes. We calculated  
237 the RR for matched PCOS patient cohorts with their respective controls and PCOS and Pain patient cohorts with  
238 their respective controls (see Methods). Results are visualized in **Figure 3** and cohorts counts, RRs, and p-values for  
239 differences in risk ratios are provided in **Table 5 - Figure supplement 8**.

240 In **Figure 3** we see the RR for both participants within the PCOS cohort (green) for 10 health outcomes and PCOS  
241 and Pain cohort (blue) for 9 health outcomes. Aside from respiratory disease, the PCOS cohort has significantly  
242 increased risk for developing the following future health outcomes compared to matched controls: mental and  
243 behavioral health, infertility, ovarian cysts, obesity, T2D, circulatory diseases, liver disease, and pain. The PCOS  
244 and Pain cohort meanwhile has significantly increased risk for developing all of the following future health  
245 outcomes compared to their matched controls: mental and behavioral health, infertility, ovarian cysts, obesity, T2D,  
246 circulatory diseases, liver disease, and kidney disease.

247 While almost all of the RR are increased for case cohorts compared to match controls, a few results stand out as  
248 being particularly interesting. Infertility, for example, a common complication associated with PCOS, has a RR of  
249 3.49 (95% CI 3.40-3.60) in PCOS cases overall. While still statistically significant, the RR is much lower, 1.12  
250 (95% CI 1.08-1.17), in PCOS and Pain cases. This difference in relative risks has a p-value of  $6.0 \times 10^{-484}$  (**Table 5 -**  
251 **Figure supplement 8**). On the other hand, ovarian cysts have a RR of 1.52 (95% CI 1.49-1.55) in PCOS cases  
252 overall but an even higher RR in PCOS and Pain cases (RR=2.31, 95% CI 2.23-2.39). This relative risk difference is  
253 also significant with a p-value of  $1.25 \times 10^{-45}$  (**Table 5 -- Figure supplement 8**). In addition, mental health  
254 conditions, circulatory diseases, and respiratory diseases all had higher RRs in PCOS and Pain cases vs. controls  
255 compared to PCOS cohort cases compared to controls (**Figure 3, Table 5 - Figure supplement 8**). We see that  
256 mental health conditions, circulatory diseases, and respiratory diseases are 1.32 (95% CI 1.29-1.34), 1.41 (95% CI  
257 1.38-1.44), and 1.35 (95% CI 1.33-1.38) in the PCOS and Pain cohort compared to 1.08 (95% CI 1.07-1.09), 1.21

258 (95% CI 1.19-1.22), and 0.87 (95% CI 0.86-0.88) in the entire PCOS cohort at statistical significance (**Figure 3,**  
259 **Table 5 - Figure supplement 8**).

260 PCOS and PCOS and Pain cohorts were at comparable increased risk for developing future liver disease and kidney  
261 disease. For liver disease, the RR in the PCOS cohort was 2.03 (95% CI 1.98-2.08) while the RR in the PCOS and  
262 Pain cohort was 1.89 (95% CI 1.82-1.97). For kidney disease, the RR of the PCOS cohort was 1.22 (95% CI 1.16-  
263 1.28) while the RR for the PCOS and Pain cohort was 1.35 (95% CI 1.24-1.46) (**Figure 3**). The relative risk  
264 difference was statistically significant for liver disease (p-value =  $3.91 \times 10^{-06}$ ) but not for kidney disease (p-value =  
265  $4.66 \times 10^{-02}$ ) (**Table 5 - Figure supplement 8**).

266 Obesity and T2D had increased risk for the PCOS cohort compared to the PCOS and Pain cohort. Obesity had a RR  
267 of 1.94 (95% CI 1.92-97) in the PCOS cohort compared to 1.15 (95% CI 1.12-1.17) in the PCOS and Pain cohort.  
268 Meanwhile, the RR for T2D was 2.59 (95% CI 2.53-2.66) in the PCOS cohort compared to 1.16 (95% CI 1.12-1.20)  
269 in the PCOS and Pain cohort (**Figure 3**). The relative risk difference was statistically significant for both obesity (p-  
270 value =  $7.78 \times 10^{-297}$ ) and T2D liver disease (p-value =  $6.72 \times 10^{-307}$ ) (**Table 5 - Figure supplement 8**).

#### 271 **Relative Risk of Future Health Outcomes Stratified by Self-Reported Race**

272 Since we observed an increased risk for future health outcomes for both the PCOS and PCOS and Pain cohorts  
273 compared to their respective controls, we next investigated if there were any race-specific risks (self-reported from  
274 EHR) for these outcomes. We stratified the PCOS case and control cohorts by self-reported race and calculated RR  
275 for pain (dysmenorrhea or abdominal and pelvic pain). There was no significant difference in RR between self-  
276 reported race groups for PCOS cases compared to matched controls (**Figure 4A**).

277 When examining the PCOS and Pain cohort, we observe race-specific differences in RR for a number of future  
278 health outcomes. **Figure 4B** shows that infertility has the highest RR in the Black or African American cohort with  
279 PCOS and Pain (RR = 3.94, 95% CI 3.41-5.54) followed by Other (RR = 3.46, 95% CI 2.78-4.31), White (RR =  
280 2.75, 95% CI 2.58-2.93), and Asian (RR = 2.22, 95% CI 1.74-2.84). The RR difference between the self-reported  
281 Asian and Black cohorts, Asian and Other cohorts, and Black or African American and White cohorts, and Other  
282 and White cohorts were all statistically significant with a p-value less than 0.05 (**Figure 4B, Table 6 - Figure**  
283 **supplement 9, Table 7 - Figure supplement 10**). On the other hand, liver diseases (**Figure 4I**) had the highest RR

284 in the Asian cohort (RR = 2.50, 95% CI 1.95-3.20) with PCOS and Pain followed by Black or African American  
285 (RR = 2.22, 95% CI 1.94-2.55), Other (RR = 2.07, 95% CI 1.77-2.41), and White (RR = 2.01, 95% CI 1.92-2.10),  
286 however, none of these RR differences were statistically significant across self-reported race groups (**Table 6 -**  
287 **Figure supplement 9, Table 7 - Figure supplement 10**). Ovarian cysts (**Figure 4C**) had the highest RR in the  
288 Black or African American cohort (RR = 2.09, 95% CI 1.91-2.30) and Other cohort (RR = 2.04, 95% CI 1.78-2.34)  
289 compared to the Asian (RR = 1.82, 95% CI 1.48-2.46) and White (RR = 1.84, 95% CI 1.77-1.92) cohorts.  
290 Meanwhile, there were similar trends for obesity (**Figure 4D**) and T2D (**Figure 4E**) where the Black or African  
291 American cohort had lower RRs than the other three self-reported race cohorts (**Table 6 - Figure supplement 9**).  
292 There were significant RR difference between the Asian and Black or African American cohorts ( $p=1.12 \times 10^{-02}$ ),  
293 Black or African American and Other cohorts ( $p=9.38 \times 10^{-03}$ ), and Black or African American and White cohorts  
294 ( $p=2.17 \times 10^{-05}$ ) for obesity but not T2D (**Figure 4D, Table 7 - Figure supplement 10**). Mental health disorders  
295 (**Figure 4F**) had an increased RR for the Asian cohort (RR=1.25, 95% CI 1.11-1.41) while the other self-reported  
296 race groups did not have significantly increased RRs. However, there was a significant difference in RR for the  
297 Asian and Other cohorts ( $p\text{-value} = 2.02 \times 10^{-02}$ ) Oppositely, kidney disease (**Figure 4D**) had a slightly increased RR  
298 (RR=1.13, 95% CI 1.03-1.24) in the White cohort while the other self-reported race groups did not have  
299 significantly increased RRs (**Table 6 - Figure supplement 9**). Circulatory disease (**Figure 4G**) had increased RRs  
300 in all four self-reported race groups, but there was no significant difference among them (**Table 7 - Figure**  
301 **supplement 10**). And finally, respiratory disease (**Figure 4H**) had decreased RRs in Asian (RR=0.91, 95% CI  
302 0.83-0.99), Other (RR=0.90, CI 0.85-0.96), and White (RR=0.93, 95% CI 0.92-0.95) cohorts but no increased or  
303 decreased risk in the Black or African American cohort (RR=1.01, 95% CI 0.91-1.07) (**Supplemental Table 6**).  
304 The difference in RR between the Black or African American cohort and the three other self-reported race groups  
305 were statistically significant with a p-value less than 0.05 (**Figure 4H, Table 7 - Figure supplement 10**).

### 306 **Medications prescribed to patients with PCOS may modify pain prevalence**

307 Since women with PCOS are often prescribed medications to help their PCOS symptoms, we aimed to investigate if  
308 there were any changes in the pain diagnoses after being prescribed systemic contraceptives (COCPs), metformin, or  
309 spironolactone. For patients with PCOS who were prescribed each of the three medications exclusively, we  
310 calculated the percent who reported dysmenorrhea or abdominal and pelvic pain both before and after the

311 prescription (see Methods). We found that there were 88,616 women with PCOS who were prescribed systemic  
312 contraceptives, 56,195 prescribed metformin, and 11,358 prescribed spironolactone. The prevalence of abdominal  
313 and pelvic pain diagnosis was 6-8X greater than that of a dysmenorrhea diagnosis for PCOS participants before they  
314 were prescribed PCOS-related medications (**Figure 5**).

315 As can be observed in **Figure 5**, participants with PCOS reported abdominal and pelvic pain at a prevalence of  
316 30.1%, 25.8%, and 22.6% respectively before their first prescription of COCPs, metformin, and spironolactone. At  
317 least 3-months after being prescribed a PCOS-associated medication, we observe a significant reduction in the  
318 prevalence of abdominal and pelvic pain. After PCOS participants were prescribed all three medications we  
319 observed a significant reduction in the prevalence of pain for all three medications. Spironolactone has the largest  
320 reduction of pain prevalence with a -7.5% reduction of pain diagnosis after prescription compared to before,  
321 followed by COCPs (-5%) and metformin (-2.5%). Similar results are observed with dysmenorrhea. While lower  
322 overall, there was also a decreased prevalence of pain for all three medications, the prevalence for dysmenorrhea was  
323 8.6%, 4.1% and 3.1% for participants with PCOS prescribed COCPs, spironolactone and metformin respectively.  
324 Unlike with abdominal and pelvic pain, COCP prescriptions were associated with the largest decrease in  
325 dysmenorrhea prevalence (-3.2%), followed by spironolactone (-2.5%), and (-1.4%).

## 326 **Discussion**

327 Polycystic ovary syndrome is the most prevalent endocrine disorder among women (Mousa & Tay, 2023; Walters et  
328 al., 2018). Diagnosis and treatment plans are customized based on the symptoms presented by women. However, an  
329 important yet often overlooked variable is pain, which may manifest as dysmenorrhea, abdominal, or pelvic pain.  
330 The use of EHR data has facilitated access to patient records containing longitudinal clinical information, utilizing  
331 the readily available International Classification of Diseases (ICD) codes<sup>16,(Wu et al., 2016)</sup>. Our study aimed to elucidate  
332 the prevalence and impact of pain among individuals with PCOS, as well as to investigate the relative risk of future  
333 health outcomes and the effectiveness of commonly prescribed medications on pain. Firstly, we observed a  
334 significantly higher prevalence of pain among women with PCOS compared to those without the condition.  
335 Specifically, 19.21% of women with PCOS reported experiencing pain, compared to 15.8% in the non-PCOS  
336 cohort. This increased prevalence reveals the substantial burden of pain as a symptom of PCOS, which often goes  
337 underreported and undertreated. Our demographic analysis of women with PCOS and Pain also revealed a

338 difference in diagnosis of pain across self-reported race groups and was especially high in the Black or African  
339 American population (32.11%) and White population (30.75%). These findings suggest that pain is a significant, yet  
340 often under-recognized, symptom of PCOS that can vary across different demographic groups. The high prevalence  
341 of pain underscores the need for healthcare clinicians to routinely assess and address pain in the management of  
342 PCOS, particularly in racially diverse populations. The diversity in pain perception and reporting among different  
343 racial groups can be influenced by a variety of factors, including genetic differences, cultural attitude towards pain,  
344 access to healthcare, and socioeconomic status. Women of different racial groups often experience different  
345 severities in pain (Portenoy et al., 2004). This can lead to disparities in pain management and treatment  
346 outcomes (Campbell & Edwards, 2012; Jamieson & Steege, 1996). Additionally, cultural differences may also affect  
347 how individuals report pain and their willingness to seek medical help (Hadjiconstantinou et al., 2017).

348 PCOS manifests with many other concomitant conditions. (Anagnostis et al., 2018; Asuncion et al., 2000; Balen et  
349 al., 2016; Escobar-Morreale et al., 2011; Hadjiconstantinou et al., 2017; Kitzinger & Willmott, 2002; Patel, 2018).  
350 Our study revealed that women with PCOS and Pain have at least a 2-fold increased prevalence of other health  
351 conditions at baseline compared to women with PCOS in general. The prevalence of obesity in the PCOS and Pain  
352 cohort was 34.68% compared to a 16.11% prevalence in the entire PCOS cohort. Excess abdominal visceral fat is  
353 well-documented to increase inflammation (Després, 2012) and PCOS is considered a pro-inflammatory condition  
354 linked with cardiovascular disease (CVD) and T2D. This inflammation underlies obesity, CVD, insulin resistance  
355 (IR) (Abraham Gnanadass et al., 2021; Osborn & Olefsky, 2012). Our data show that 22.23% of patients with PCOS  
356 and Pain also had a diagnosis for disease of the circulatory system and 9.05% of PCOS and Pain patients had a T2D  
357 diagnosis. These results underscore the health challenges faced by individuals dealing with both PCOS and Pain  
358 issues necessitating treatment approaches that address both the syndrome itself and its accompanying symptoms.

359 Women with PCOS are significantly at risk for future health outcomes such as infertility, T2D, coronary heart  
360 disease, dyslipidemia, depression, non-alcoholic fatty liver disease, and obstructive sleep (Anagnostis et al., 2018;  
361 Ávila et al., 2014; Chaudhuri, 2023; McGowan, 2011; Patel, 2018; Zore et al., 2017). Our results also highlight  
362 specific risks for different subgroups (PCOS overall and PCOS and Pain). In the overall PCOS cohort, the highest  
363 risks are for infertility (RR = 3.49) and T2D (RR = 2.59). However, in patients with PCOS and Pain, the highest  
364 risks are for ovarian cysts (RR = 2.31) and liver disease (RR = 1.89). Ovarian cysts are a hallmark feature of

365 polycystic ovarian morphology (PCOM) which is caused by immature/ arrested follicles that do not ovulate and  
366 cause a “string of pearls” appearance and enlarging of the ovaries(Adashi et al., 2023; Tsilchorozidou et al., 2004).  
367 Ovarian cysts have long been disputed by the PCOS research community as not being associated with PCOS and  
368 therefore, not being associated with pain. However, the magnitude of this risk as shown in our results underscores  
369 the importance of regular monitoring and appropriate management strategies for patients presenting with both PCOS  
370 and pain symptoms. PCOS is known to be linked with non-alcoholic fatty liver disease (NAFLD)(Butt & Devi,  
371 2024; Kumarendran et al., 2018; Torres & Harrison, 2016). This association between PCOS and pain and liver  
372 disease may be explained by the shared metabolic disturbances common to both PCOS and NAFLD, such as insulin  
373 resistance and dyslipidemia(Georgescu, 2022; Qu et al., 2013; Torres & Harrison, 2016). The presence of chronic  
374 pain could potentially exacerbate these metabolic imbalances through various mechanisms, including altered stress  
375 responses and lifestyle factors(Kivimäki et al., 2023). These findings suggest that patients with PCOS who also  
376 experience chronic pain may represent a distinct phenotype with unique risk profiles. Additionally, the increased  
377 risk for future health conditions in the PCOS and Pain cohort also suggest that pain may be an important marker for  
378 identifying individuals at future health outcomes, necessitating more vigilant monitoring and proactive intervention.

379 Lastly, our analysis also delved into the impact of common PCOS medications on pain management. We found that  
380 the prescribing of COCPs, metformin, and spironolactone was associated with a reduction in reported pain  
381 symptoms. Specifically, individuals who received these medications showed a 3.68% average decreased prevalence  
382 of pain diagnoses after treatment, suggesting that these medications may also manage pain symptoms in individuals  
383 with PCOS. A recent publication looked at the association of PCOS-related medications with adverse drug reactions  
384 (ADRs) for women with PCOS and found that metformin and COCPs was significantly associated with abdominal  
385 pain (Sidra et al., 2019). However, this study did not measure the association with ADRs with pain before and after  
386 the prescription of PCOS medication. These results offer insights for application showing that efficient  
387 pharmacological management of PCOS symptoms can also help alleviate associated pain. Additionally, the efficacy  
388 of these medications in reducing pain, specifically spironolactone and COCPs, which are prescribed in PCOS for  
389 their antiandrogenic effects, may suggest hyperandrogenism to be a contributor to increased pain in PCOS, and a  
390 potential target for addressing pain in PCOS. Furthermore, the advantages of these treatments may be beneficial, not  
391 just in managing typical PCOS symptoms, but also in tackling the significant burden of pain experienced by many  
392 women with PCOS highlights a valuable role in drug repurposing.

393 Our study has limitations that need to be considered when interpreting the findings. Firstly, relying on ICD codes to  
394 identify pain and other health outcomes may not capture the range of experiences and clinical intricacies. While  
395 these codes offer an approach to data collection, they might not fully reflect variations in pain severity or the  
396 personal experiences of those, with PCOS(Kataria & Ravindran, 2020). Although extensive, the use of EHR data  
397 may still contain gaps or discrepancies that could impact the accuracy of our results(Madden et al., 2016).  
398 Furthermore, since this study is observational, by nature it cannot establish a causal relationship between PCOS,  
399 pain and future health outcomes. Moreover, the demographic variations observed—especially the higher occurrence  
400 of pain among individuals—could be influenced by socio-economic factors, access to healthcare, nutrition and other  
401 unmeasured variables. In addition, self-reported race was not captured the same globally as it is not a variable that is  
402 coded by HCOs world-wide. Lastly, TriNetX captures only medication prescriptions, which does not allow our  
403 analysis to consider adherence issues, dosage differences, or concurrent treatments that may influence the outcomes  
404 observed. Future research should focus on overcoming these limitations through studies with detailed clinical  
405 assessments and a broader range of demographic and socio-economic factors.

## 406 **Conclusion**

407 Various pain subtypes can profoundly affect the daily lives of PCOS patients. Due to limited research in clinical and  
408 laboratory settings, the effects and underlying mechanisms of pain remain unclear. Our study highlights the  
409 significant prevalence and impact of pain in women with PCOS, revealing critical differences across racial groups  
410 and underscoring the heightened risk for future health complications in those experiencing pain. These findings  
411 emphasize the importance of comprehensive pain assessment, management and inclusion as guidelines in the  
412 standard care of PCOS, with a particular focus on addressing racial disparities. Additionally, the observed  
413 effectiveness of medications such as systemic oral contraceptives, metformin, and spironolactone in reducing pain  
414 symptoms provides valuable insights for clinical practice, suggesting that these treatments can offer dual benefits in  
415 managing both PCOS and associated pain. Dysmenorrhea, abdominal, and pelvic pain are common experiences in  
416 women with PCOS, in the absence of pelvic-related conditions that can contribute to this type of pain such as pelvic  
417 inflammatory disease, endometriosis, and fibroids. It is crucial to distinguish between pain originating from PCOS  
418 and Pain arising from comorbidities to ensure appropriate management and targeted treatment strategies for  
419 improving the quality of life in affected individuals.



420 **Funding**

421 Tess Cherlin was supported by NIH | National Institute of General Medical Sciences (NIGMS) (grant #  
422 K12GM081259 (HHS))

423 **Conflict of Interest**

424 Authors declare they have no financial interests to disclose.

425 **Authors' Contributions**

426 SSV, SO, and KS conceived and supervised the study. TC and SSV designed the methods. TC performed the  
427 analysis, analyzed the data and designed the figures. SM and TC wrote the manuscript. All authors interpreted the  
428 results. All authors read, edited, and approved the final manuscript.

429 **Compliance with Ethical Standards**

430 Not Applicable

431 **Data Sharing**

432 All summary-level data has all been included in this manuscript.

433 **Acknowledgements**

434 We would like to acknowledge the patients in the TriNetX Global Network without whom this work would not be  
435 possible.

436 **Disclosure**

437 AI Generative (ChatGPT) was used as a language editing tool.

438

439

440

441

442

443

444  
445  
446  
447  
448  
449  
450  
451  
452  
453  
454  
455  
456  
457  
458  
459  
460  
461  
462  
463  
464  
465  
466  
467  
468  
469  
470  
471

**References**

Abraham Gnanadass, S., Divakar Prabhu, Y., & Valsala Gopalakrishnan, A. (2021). Association of metabolic and inflammatory markers with polycystic ovarian syndrome (PCOS): an update. *Archives of Gynecology and Obstetrics*, 303, 631-643.

Adashi, E. Y., Cibula, D., Peterson, M., & Azziz, R. (2023). The polycystic ovary syndrome: the first 150 years of study. *F&S Reports*, 4(1), 2-18.

Altman, D. G., & Bland, J. M. (2003). Interaction revisited: the difference between two estimates. *BMJ*, 326(7382), 219.

Anagnostis, P., Tarlatzis, B. C., & Kauffman, R. P. (2018). Polycystic ovarian syndrome (PCOS): Long-term metabolic consequences. *Metabolism*, 86, 33-43.

Asuncion, M., Calvo, R. M., San Millán, J. L., Sancho, J., Avila, S., & Escobar-Morreale, H. c. F. (2000). A prospective study of the prevalence of the polycystic ovary syndrome in unselected Caucasian women from Spain. *The Journal of Clinical Endocrinology & Metabolism*, 85(7), 2434-2438.

Austin, P. C. (2011). An introduction to propensity score methods for reducing the effects of confounding in observational studies. *Multivariate behavioral research*, 46(3), 399-424.

Ávila, M. A. P. d., Bruno, R. V., Barbosa, F. C., Andrade, F. C. d., & Nardi, A. E. (2014). Polycystic ovary syndrome: implications of metabolic dysfunction. *Revista do Colégio Brasileiro de Cirurgiões*, 41, 106-110.

Azziz, R., Carmina, E., Chen, Z., Dunaif, A., Laven, J. S. E., Legro, R. S., Lizneva, D., Natterson-Horowitz, B., Teede, H. J., & Yildiz, B. O. (2016). Polycystic ovary syndrome. *Nature Reviews Disease Primers*, 2(1), 16057. <https://doi.org/10.1038/nrdp.2016.57>

- 472 Balen, A. H., Morley, L. C., Misso, M., Franks, S., Legro, R. S., Wijeyaratne, C. N., Stener-Victorin, E., Fauser, B.  
473 C., Norman, R. J., & Teede, H. (2016). The management of anovulatory infertility in women with  
474 polycystic ovary syndrome: an analysis of the evidence to support the development of global WHO  
475 guidance. *Human reproduction update*, 22(6), 687-708.
- 476 Butt, A. S., & Devi, J. (2024). Polycystic ovary syndrome and nonalcoholic fatty liver disease. In *Polycystic Ovary*  
477 *Syndrome* (pp. 92-99). Elsevier.
- 478 Campbell, C. M., & Edwards, R. R. (2012). Ethnic differences in pain and pain management. *Pain management*,  
479 2(3), 219-230.
- 480 Chaudhuri, A. (2023). Polycystic ovary syndrome: Causes, symptoms, pathophysiology, and remedies. *Obesity*  
481 *Medicine*, 39, 100480.
- 482 Cronin, L., Guyatt, G., Griffith, L., Wong, E., Azziz, R., Futterweit, W., Cook, D., & Dunaif, A. (1998).  
483 Development of a health-related quality-of-life questionnaire (PCOSQ) for women with polycystic ovary  
484 syndrome (PCOS). *The Journal of Clinical Endocrinology & Metabolism*, 83(6), 1976-1987.
- 485 Després, J.-P. (2012). Abdominal obesity and cardiovascular disease: is inflammation the missing link? *Canadian*  
486 *Journal of Cardiology*, 28(6), 642-652.
- 487 Drosdzol, A., Skrzypulec, V., Mazur, B., & Pawlińska-Chmara, R. (2007). Quality of life and marital sexual  
488 satisfaction in women with polycystic ovary syndrome. *Folia histochemica et cytobiologica*, 45(I), 93-97.
- 489 Elsenbruch, S., Hahn, S., Kowalsky, D., Öffner, A. H., Schedlowski, M., Mann, K., & Janssen, O. E. (2003).  
490 Quality of life, psychosocial well-being, and sexual satisfaction in women with polycystic ovary syndrome.  
491 *The Journal of Clinical Endocrinology & Metabolism*, 88(12), 5801-5807.
- 492 Escobar-Morreale, H. F., Luque-Ramírez, M., & González, F. (2011). Circulating inflammatory markers in  
493 polycystic ovary syndrome: a systematic review and metaanalysis. *Fertility and sterility*, 95(3), 1048-1058.  
494 e1042.
- 495 ESHRE, T. R., & Group, A.-S. P. C. W. (2004). Revised 2003 consensus on diagnostic criteria and long-term health  
496 risks related to polycystic ovary syndrome. *Fertility and sterility*, 81(1), 19-25.
- 497 Georgescu, C. E. (2022). Polycystic ovary syndrome and nonalcoholic fatty liver disease. In *Polycystic Ovary*  
498 *Syndrome* (pp. 187-216). Elsevier.

- 499 Guo, S., & Fraser, M. W. (2014). *Propensity score analysis: Statistical methods and applications* (Vol. 11). SAGE  
500 publications.
- 501 Hadjiconstantinou, M., Mani, H., Patel, N., Levy, M., Davies, M., Khunti, K., & Stone, M. (2017). Understanding  
502 and supporting women with polycystic ovary syndrome: a qualitative study in an ethnically diverse UK  
503 sample. *Endocrine connections*, 6(5), 323-330.
- 504 Hahn, S., Janssen, O. E., Tan, S., Pleger, K., Mann, K., Schedlowski, M., Kimmig, R., Benson, S., Balamitsa, E., &  
505 Elsenbruch, S. (2005). Clinical and psychological correlates of quality-of-life in polycystic ovary  
506 syndrome. *European journal of endocrinology*, 153(6), 853-860.
- 507 Haukoos, J. S., & Lewis, R. J. (2015). The propensity score. *Jama*, 314(15), 1637-1638.
- 508 Jamieson, D. J., & Steege, J. F. (1996). The prevalence of dysmenorrhea, dyspareunia, pelvic pain, and irritable  
509 bowel syndrome in primary care practices. *Obstetrics & Gynecology*, 87(1), 55-58.
- 510 Kataria, S., & Ravindran, V. (2020). Electronic health records: a critical appraisal of strengths and limitations.  
511 *Journal of the Royal College of Physicians of Edinburgh*, 50(3), 262-268.
- 512 Kitzinger, C., & Willmott, J. (2002). 'The thief of womanhood': women's experience of polycystic ovarian  
513 syndrome. *Social science & medicine*, 54(3), 349-361.
- 514 Kivimäki, M., Bartolomucci, A., & Kawachi, I. (2023). The multiple roles of life stress in metabolic disorders.  
515 *Nature Reviews Endocrinology*, 19(1), 10-27.
- 516 Kruse, C. S., Stein, A., Thomas, H., & Kaur, H. (2018). The use of electronic health records to support population  
517 health: a systematic review of the literature. *Journal of medical systems*, 42(11), 214.
- 518 Kumarendran, B., O'Reilly, M. W., Manolopoulos, K. N., Toulis, K. A., Gokhale, K. M., Sitch, A. J., Wijeyaratne,  
519 C. N., Coomarasamy, A., Arlt, W., & Nirantharakumar, K. (2018). Polycystic ovary syndrome, androgen  
520 excess, and the risk of nonalcoholic fatty liver disease in women: a longitudinal study based on a United  
521 Kingdom primary care database. *PLoS medicine*, 15(3), e1002542.
- 522 Lamping, D. L., Rowe, P., Clarke, A., Black, N., & Lessof, L. (1998). Development and validation of the  
523 menorrhagia outcomes questionnaire. *BJOG: An International Journal of Obstetrics & Gynaecology*,  
524 105(7), 766-779.

- 525 Li, Y., Li, Y., Ng, E. H. Y., Stener-Victorin, E., Hou, L., Wu, T., Han, F., & Wu, X. (2011). Polycystic ovary  
526 syndrome is associated with negatively variable impacts on domains of health-related quality of life:  
527 evidence from a meta-analysis. *Fertility and sterility*, *96*(2), 452-458.
- 528 Madden, J. M., Lakoma, M. D., Rusinak, D., Lu, C. Y., & Soumerai, S. B. (2016). Missing clinical and behavioral  
529 health data in a large electronic health record (EHR) system. *Journal of the American Medical Informatics  
530 Association*, *23*(6), 1143-1149.
- 531 Maletzky, A., Böck, C., Tschoellitsch, T., Roland, T., Ludwig, H., Thumfart, S., Giretzlehner, M., Hochreiter, S., &  
532 Meier, J. (2022). Lifting hospital electronic health record data treasures: challenges and opportunities.  
533 *JMIR Medical Informatics*, *10*(10), e38557.
- 534 McGowan, M. P. (2011). Polycystic ovary syndrome: a common endocrine disorder and risk factor for vascular  
535 disease. *Current treatment options in cardiovascular medicine*, *13*(4), 289-301.
- 536 McHorney, C. A., Ware John, J., & ANASTASIAE, R. (1993). The MOS 36-Item Short-Form Health Survey (SF-  
537 36): II. Psychometric and clinical tests of validity in measuring physical and mental health constructs.  
538 *Medical care*, *31*(3), 247-263.
- 539 Mousa, A., & Tay, C. T. (2023). Technical Report for the 2023 International Evidence-based Guideline for the  
540 Assessment and Management of Polycystic Ovary Syndrome: 2023 Update.  
541 Organization, W. H. (28 June 2023). *Polycystic ovary syndrome*. World Health Organization.
- 542 Osborn, O., & Olefsky, J. M. (2012). The cellular and signaling networks linking the immune system and  
543 metabolism in disease. *Nature medicine*, *18*(3), 363-374.
- 544 Patel, S. (2018). Polycystic ovary syndrome (PCOS), an inflammatory, systemic, lifestyle endocrinopathy. *The  
545 Journal of steroid biochemistry and molecular biology*, *182*, 27-36.
- 546 Penrod, N., Okeh, C., Velez Edwards, D. R., Barnhart, K., Senapati, S., & Verma, S. S. (2023). Leveraging  
547 electronic health record data for endometriosis research. *Frontiers in Digital Health*, *5*, 1150687.
- 548 Portenoy, R. K., Ugarte, C., Fuller, I., & Haas, G. (2004). Population-based survey of pain in the United States:  
549 differences among white, African American, and Hispanic subjects. *The journal of pain*, *5*(6), 317-328.
- 550 Qu, Z., Zhu, Y., Jiang, J., Shi, Y., & Chen, Z. (2013). The clinical characteristics and etiological study of  
551 nonalcoholic fatty liver disease in Chinese women with PCOS. *Iranian journal of reproductive medicine*,  
552 *11*(9), 725.

- 553 Sidra, S., Tariq, M. H., Farrukh, M. J., & Mohsin, M. (2019). Evaluation of clinical manifestations, health risks, and  
554 quality of life among women with polycystic ovary syndrome. *PloS one*, *14*(10), e0223329.
- 555 Stein, I. F., & Leventhal, M. L. (1935). Amenorrhea associated with bilateral polycystic ovaries. *American journal*  
556 *of obstetrics and gynecology.*, *29*(2), 181-191. [https://doi.org/10.1016/S0002-9378\(15\)30642-6](https://doi.org/10.1016/S0002-9378(15)30642-6)
- 557 Teede, H., Deeks, A., & Moran, L. (2010). Polycystic ovary syndrome: a complex condition with psychological,  
558 reproductive and metabolic manifestations that impacts on health across the lifespan. *BMC Medicine*, *8*(1),  
559 41. <https://doi.org/10.1186/1741-7015-8-41>
- 560 Teede, H. J., Misso, M. L., Costello, M. F., Dokras, A., Laven, J., Moran, L., Piltonen, T., & Norman, R. J. (2018).  
561 Recommendations from the international evidence-based guideline for the assessment and management of  
562 polycystic ovary syndrome. *Human reproduction*, *33*(9), 1602-1618.
- 563 Torres, D. M., & Harrison, S. A. (2016). Nonalcoholic Fatty Liver Disease: Clinical Features, Disease Modifiers,  
564 and Natural History. *Alcoholic and Non-Alcoholic Fatty Liver Disease: Bench to Bedside*, 183-194.
- 565 Tsilchorozidou, T., Overton, C., & Conway, G. S. (2004). The pathophysiology of polycystic ovary syndrome.  
566 *Clinical endocrinology*, *60*(1), 1-17.
- 567 Walters, K. A., Gilchrist, R. B., Ledger, W. L., Teede, H. J., Handelsman, D. J., & Campbell, R. E. (2018). New  
568 perspectives on the pathogenesis of PCOS: neuroendocrine origins. *Trends in Endocrinology &*  
569 *Metabolism*, *29*(12), 841-852.
- 570 Wu, P.-Y., Cheng, C.-W., Kaddi, C. D., Venugopalan, J., Hoffman, R., & Wang, M. D. (2016). –Omic and  
571 electronic health record big data analytics for precision medicine. *IEEE Transactions on Biomedical*  
572 *Engineering*, *64*(2), 263-273.
- 573 Zawadri, J. (1992). Diagnostic criteria for polycystic ovary syndrome: towards a rational approach. *Polycystic ovary*  
574 *syndrome. Current issues in endocrinology and metabolism*.
- 575 Zhao, J., Papapetrou, P., Asker, L., & Boström, H. (2017). Learning from heterogeneous temporal data in electronic  
576 health records. *Journal of biomedical informatics*, *65*, 105-119.
- 577 Zore, T., Joshi, N. V., Lizneva, D., & Azziz, R. (2017). Polycystic ovarian syndrome: long-term health  
578 consequences. *Seminars in Reproductive Medicine*,
- 579

**Figure 1. Analysis pipeline.** Analysis pipeline to calculate relative risk ratios (RR) for future health outcomes in PCOS (green) and PCOS and Pain (blue) cohorts for the 76859,666 women queried. STEP 1 shows the number of women in the case and controls for both the PCOS (green) and PCOS and Pain (blue) cohorts. STEP 2 shows the number of cases and controls after 1:1 propensity score matching. STEP 3 shows the different future health conditions that were considered for future health outcomes. STEP 4 shows that the final step is calculating the relative risk for the future health outcomes.

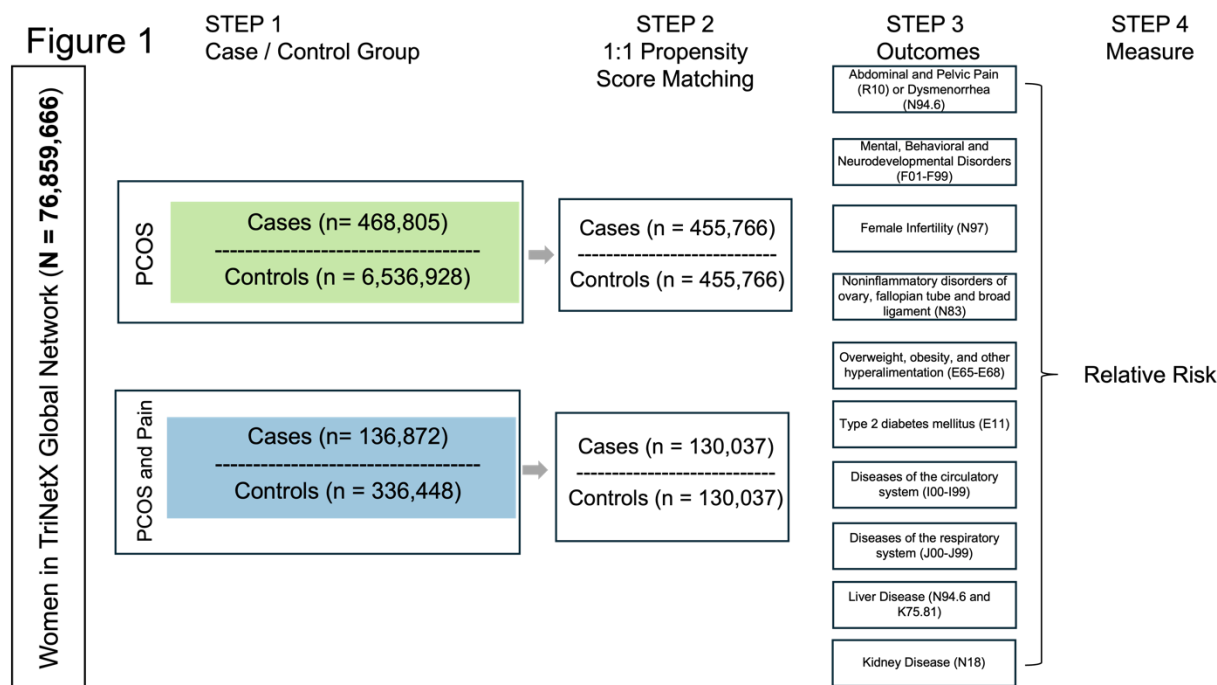

**Figure 2. Prevalence of conditions and medications associated with PCOS and Pain.** Barplots show the prevalence (%) (left y-axis) of different diseases associated with PCOS (green) and PCOS and Pain (blue) (x-axis). Purple line indicates the prevalence fold-change between the PCOS and PCOS and Pain cohorts (right y-axis).

**Figure 2**

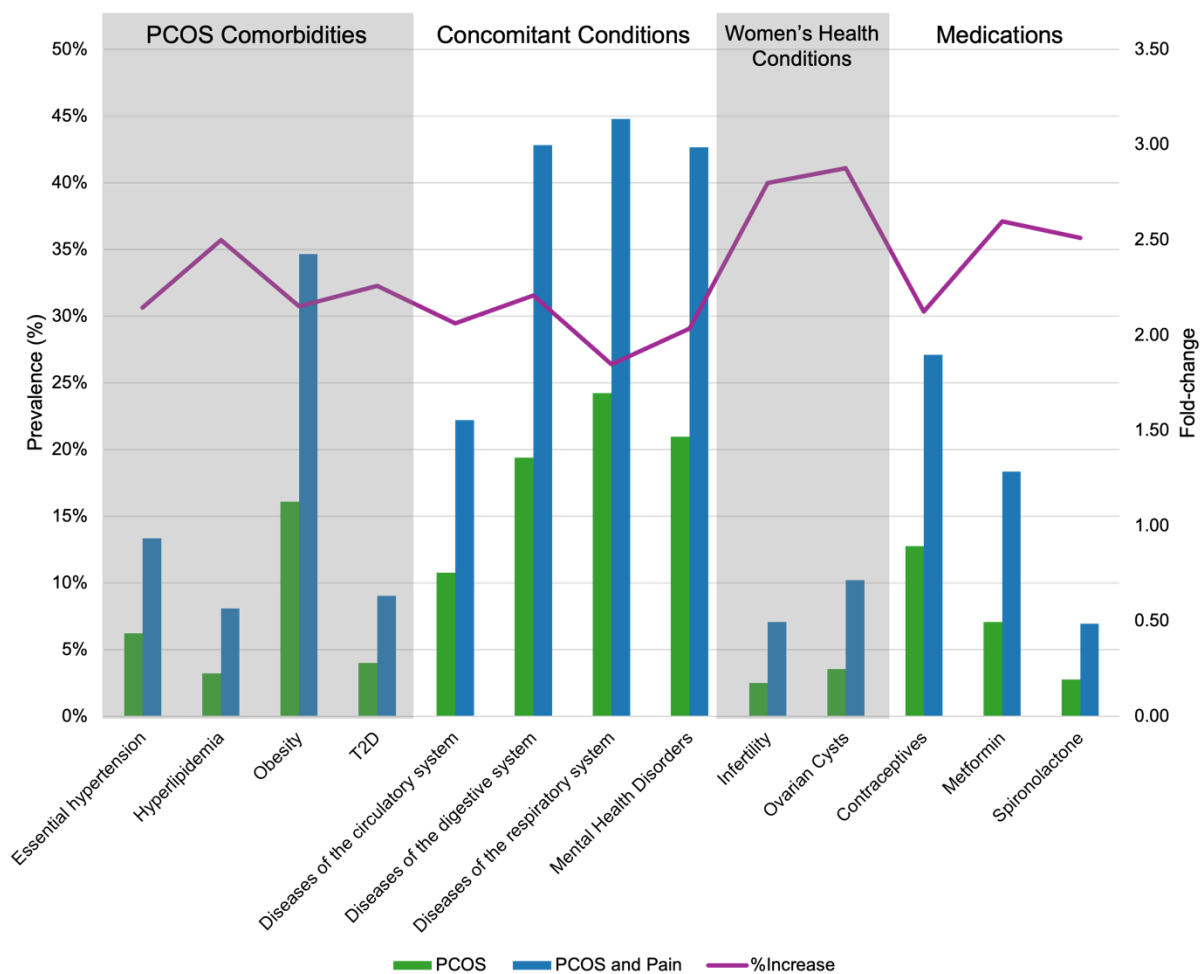



**Figure 3. Relative risk ratios for future health outcomes associated with PCOS and Pain.** Relative risk ratios (RR) (x-axis) for future health outcomes (y-axis) for both PCOS (green) and PCOS and Pain (blue) cohorts. Darker hue circles indicate RR, while lighter hue boxes indicate the 95% confidence intervals. The black dashed line is set 1 and is the threshold for RR, where  $> 1$  is increased RR and  $< 1$  is decreased RR.

## Figure 3

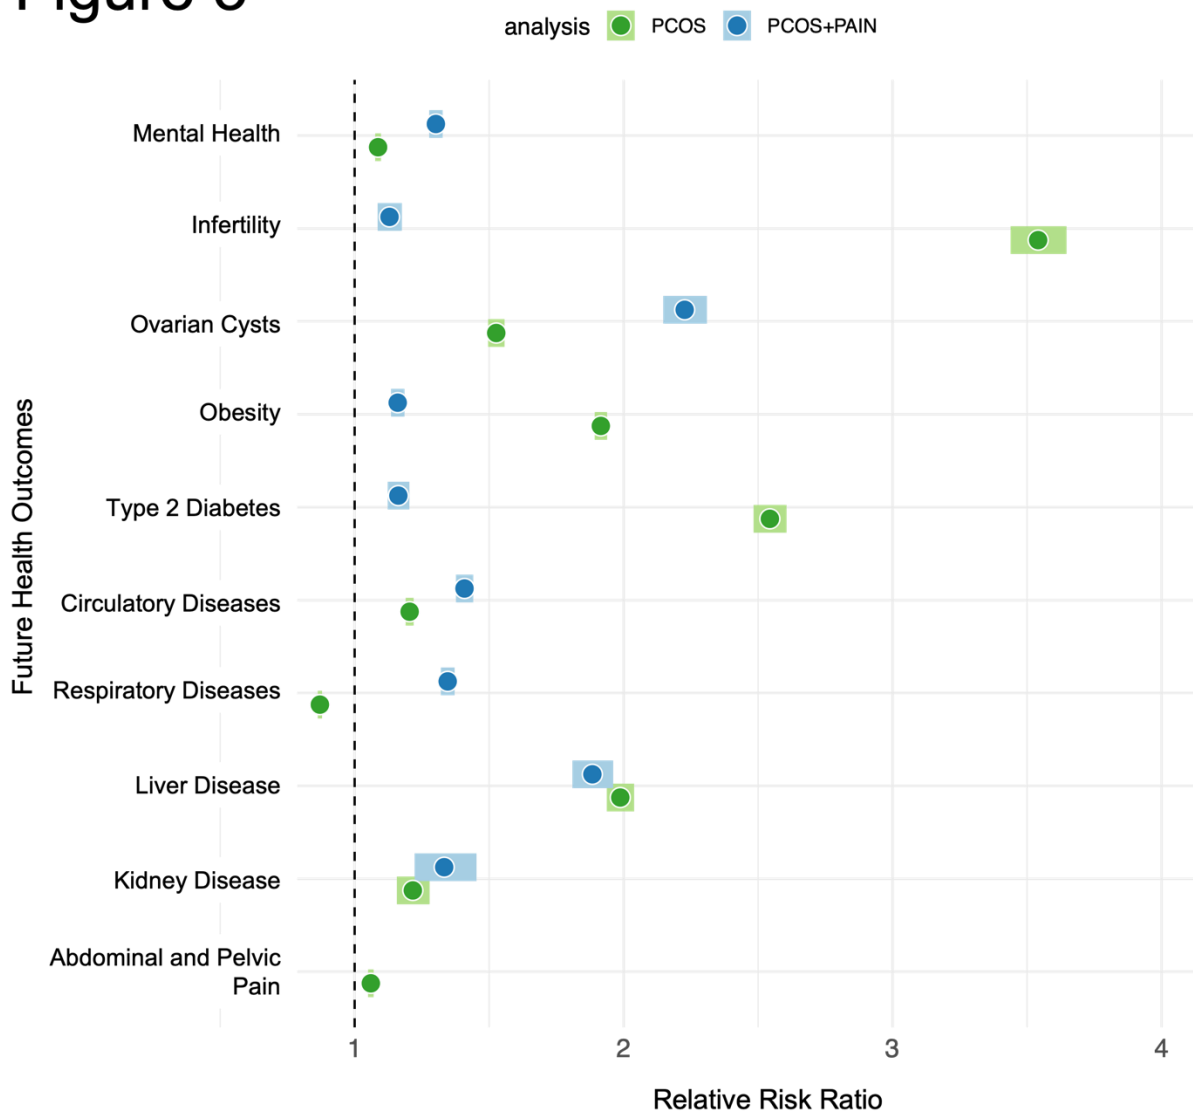

**Figure 4 Parts A-J. Self-reported race-stratified relative risk ratios for future health outcomes.**

Relative risk ratios (RR) for future health outcomes (y-axis) stratified by self-reported race. Colors represent different self-reported race groups (x-axis): Asian (orange), Black or African American (yellow), Other (red), White (purple). **A.** Light hues indicate RR calculation for entire PCOS cohort. **B-J.** Dark hues indicate RR calculation for PCOS and Pain cohorts. Error bars represent the 95% confidence intervals. Significant differences between RR are represented by asterisks (\*), where p-value  $\leq 0.05 = *$ , p-value  $\leq 0.005 = **$ , p-value  $\leq 0.0005 = ***$ , and p-value  $\leq 0.00005 = ****$ . Red dashed lines is set 1 and is the threshold for RR, where  $> 1$  is increased RR and  $< 1$  is decreased RR.

Figure 4

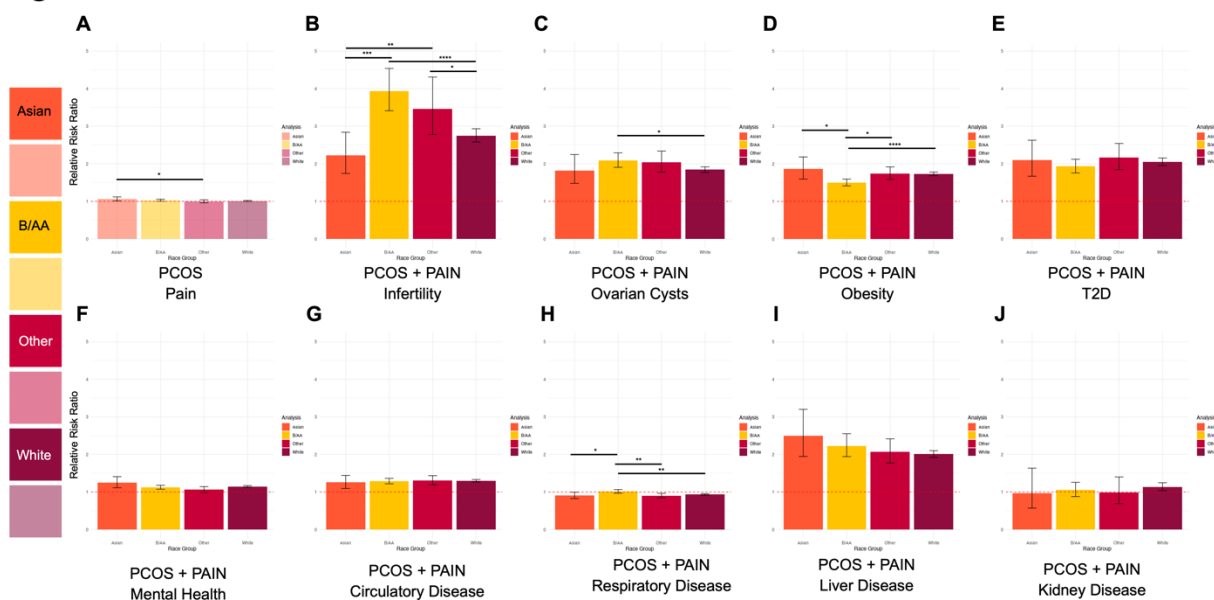

**Figure 5. Prevalence of Pain for women with PCOS before and after medications.** Prevalence (%) changes (y-axis) of pain for women with PCOS cohort before and after prescription of COCPs (yellow), metformin (purple), and spironolactone (orange) (x-axis). Analysis was done separately for abdominal and pelvic pain (solid lines) and dysmenorrhea (dashed lines).

Figure 5

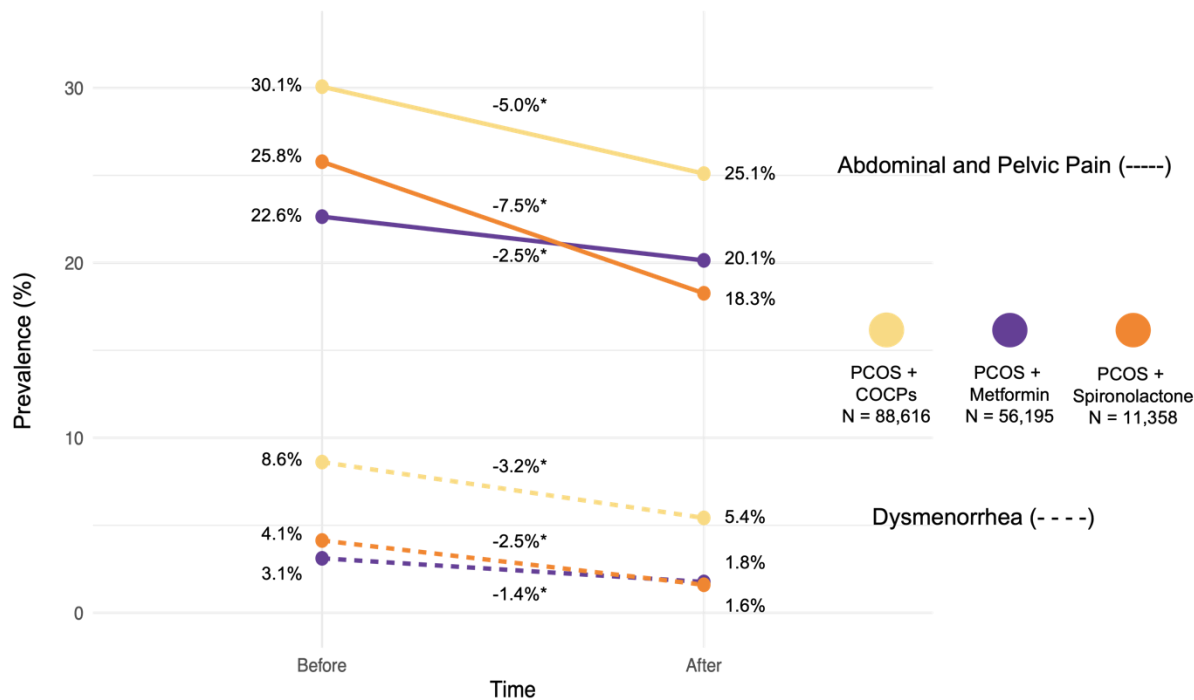

Source: https://medrxiv.org/content/10.1101/2024.10.15.24315513.full.pdf
